# Supplementary material for: Sensitivity of Buff-Tailed Bumblebee (Bombus terrestris L.) to Insecticides with Different Mode of Action
Source: MDPI journal article supplement (doi:10.3390/insects13020184), 2022-02-10
Supplement: s1 [file s1]

**Table S1.** Number of workers included in the bioassays with insecticides, from each of the commercial colonies used. Only the dose-response bioassays used for subsequent probit analysis are included.

| Bioassay      | N° of replicate (colony) | N° of workers |
|---------------|--------------------------|---------------|
| Imidacloprid  | 1                        | 42            |
|               | 2                        | 26            |
|               | 3                        | 30            |
|               | 4                        | 28            |
|               | 5                        | 23            |
| Thiacloprid   | 1                        | 38            |
|               | 2                        | 57            |
| Deltamethrin  | 1                        | 47            |
|               | 2                        | 52            |
| Esfenvalerate | 1                        | 24            |
|               | 2                        | 20            |
|               | 3                        | 32            |
|               | 4                        | 34            |
|               | 5                        | 17            |
|               | 6                        | 28            |
|               | 7                        | 36            |
| Sulfoxaflor   | 1                        | 50            |
|               | 2                        | 26            |
|               | 3                        | 21            |
|               | 4                        | 16            |
|               | 5                        | 13            |
